# Supplementary material for: Genetic and immune microenvironment characterization of HER2‐positive gastric cancer: Their association with response to trastuzumab‐based treatment
Source: PubMed Central journal article supplement (PMC10225221; doi:10.1002/cam4.5769), 2023-03-14
Supplement: CAM4-12-10371-s002.pdf [file CAM4-12-10371-s002.pdf]

**Supplementary Table 3.**

| <b>Antibody</b> | <b>Product</b>                                                             | <b>Antibody</b> | <b>Product</b>                                            |
|-----------------|----------------------------------------------------------------------------|-----------------|-----------------------------------------------------------|
| EGFR            | Ready to use, 3C6, cat#790-2988, Ventana Medical Systems (Tucson, AZ, USA) | CD3             | 1:300, cat#A0452, DAKO                                    |
| HER2            | Ready to use, 4B5, cat#790-2991, Ventana Medical Systems                   | CD8             | Ready to use, SP57, cat#790-4460, Ventana Medical Systems |
| HER3            | 1:100, SP71, cat#ab93739, Abcam                                            | CD57            | 1:200, HNK-1/Leu-7, cat#ab187274, Abcam                   |
| CyclinA         | 1:1000, CY-A1, cat#C4710-2ML, Sigma-Aldrich (Darmstadt, Germany)           | CD20            | 1:300, L26, cat#M0755, DAKO                               |
| CyclinD1        | 1:200, M-20, cat#sc-718, Santa-Cruz                                        | CD68            | 1:100, PG-M1, cat#M0876, DAKO                             |
| CyclinD3        | 1:50, DCS-22, cat#MA5-12717, Invitrogen                                    | CD163           | 1:500, OTI2G12, cat#ab156769, Abcam                       |
| CyclinE         | 1:100, HE12, cat#MA5-14336, Invitrogen                                     | FOXP3           | 1:50, 236A/E7, cat#ab20034, Abcam                         |
| CDK6            | 1:1000, cat# sc-7961, Santa-Cruz BT, (California, USA)                     |                 |                                                           |
| NRG1            | 1:2000, cat#ab53104, Abcam                                                 |                 |                                                           |
| PLK1            | 1:1000, cat #4513, Cell signaling, (Beverly, MA, USA)                      |                 |                                                           |
| P53             | 1:1000, DO-7, cat#M7001, DAKO                                              |                 |                                                           |
| P27             | 1:300, cat#E2604, Spring Bioscience                                        |                 |                                                           |
| P21             | 1:200, 187, cat#sc-817, Santa-Cruz                                         |                 |                                                           |
| RB              | 1:100, G3-245, cat#554136, BD Biosciences                                  |                 |                                                           |
| Ki-67           | 1:100, MIB-1, cat#M7240, DAKO                                              |                 |                                                           |
| PD-L1           | 1:30, 22C3, cat#M3653, DAKO                                                |                 |                                                           |
