# Supplementary material for: Genetic and immune microenvironment characterization of HER2‐positive gastric cancer: Their association with response to trastuzumab‐based treatment
Source: PubMed Central journal article supplement (PMC10225221; doi:10.1002/cam4.5769), 2023-03-14
Supplement: CAM4-12-10371-s004.pdf [file CAM4-12-10371-s004.pdf]

**Supplementary Table 1.**

| Features                                         | Exploration cohort |       |               |       | P-value             | Total           |       |
|--------------------------------------------------|--------------------|-------|---------------|-------|---------------------|-----------------|-------|
|                                                  | Group 1            |       | Group 2       |       |                     | N               | %     |
|                                                  | N                  | %     | N             | %     |                     |                 |       |
| <b>Total</b>                                     | 12                 | 100.0 | 9             | 100.0 |                     | 83              | 100.0 |
| <b>Sex</b>                                       |                    |       |               |       |                     |                 |       |
| Female                                           | 1                  | 8.3   | 1             | 11.1  | 1.000 <sup>a</sup>  | 15              | 18.1  |
| Male                                             | 11                 | 91.7  | 8             | 88.9  |                     | 68              | 81.9  |
| <b>Age</b>                                       |                    |       |               |       |                     |                 |       |
| <65                                              | 7                  | 58.3  | 6             | 66.7  | 1.000 <sup>a</sup>  | 48              | 57.8  |
| ≥65                                              | 5                  | 41.7  | 3             | 33.3  |                     | 35              | 42.2  |
| <b>Lauren classification</b>                     |                    |       |               |       |                     |                 |       |
| Intestinal type                                  | 8                  | 66.6  | 6             | 66.7  | 0.425 <sup>a</sup>  | 58              | 69.9  |
| Diffuse type                                     | 2                  | 16.7  | 3             | 33.3  |                     | 19              | 22.9  |
| Mixed type                                       | 2                  | 16.7  | 0             | 0.0   |                     | 6               | 7.2   |
| <b>Progression after starting HER2 treatment</b> |                    |       |               |       |                     |                 |       |
| Before 6 months                                  | 0                  | 0.0   | 9             | 100.0 | <0.001 <sup>a</sup> | 24              | 28.9  |
| After 6 months                                   | 2                  | 16.7  | 0             | 0.0   |                     | 34              | 41.0  |
| Progression free at last follow-up               | 10                 | 83.3  | 0             | 0.0   |                     | 25              | 30.1  |
| <b>Progression-free survival (months)</b>        |                    |       |               |       |                     |                 |       |
| median [range]                                   | 22.5 [11.7-68.1]   |       | 4.3 [1.7-5.6] |       | <0.001 <sup>b</sup> | 12.4 [5.3-23.3] |       |

<sup>a</sup>Fisher's exact test; <sup>b</sup>Mann-Whitney test
