# Supplementary material for: Genetic and immune microenvironment characterization of HER2‐positive gastric cancer: Their association with response to trastuzumab‐based treatment
Source: PubMed Central journal article supplement (PMC10225221; doi:10.1002/cam4.5769), 2023-03-14
Supplement: CAM4-12-10371-s005.pdf [file CAM4-12-10371-s005.pdf]

**Supplementary Table 4.**

| <b>KEGG pathways</b>                                    | <b>Size</b> | <b>ES</b> | <b>NES</b> | <b>NOM<br/>p-val</b> | <b>FDR<br/>q-val</b> | <b>FWER<br/>p-val</b> |
|---------------------------------------------------------|-------------|-----------|------------|----------------------|----------------------|-----------------------|
| <b>Up regulated in Group 1 than Group 2</b>             |             |           |            |                      |                      |                       |
| RIBOSOME                                                | 86          | 0.63      | 2.22       | 0.000                | 0.000                | 0.000                 |
| SPLICEOSOME                                             | 125         | 0.56      | 2.05       | 0.000                | 0.000                | 0.001                 |
| AMINOACYL TRNA BIOSYNTHESIS                             | 41          | 0.66      | 2.00       | 0.000                | 0.000                | 0.001                 |
| CELL CYCLE                                              | 124         | 0.55      | 1.98       | 0.000                | 0.000                | 0.001                 |
| RNA DEGRADATION                                         | 54          | 0.63      | 1.98       | 0.000                | 0.000                | 0.001                 |
| PROTEASOME                                              | 44          | 0.63      | 1.96       | 0.000                | 0.000                | 0.002                 |
| HUNTINGTONS DISEASE                                     | 160         | 0.51      | 1.92       | 0.000                | 0.000                | 0.004                 |
| PARKINSONS DISEASE                                      | 101         | 0.54      | 1.89       | 0.000                | 0.001                | 0.009                 |
| DNA REPLICATION                                         | 36          | 0.62      | 1.81       | 0.000                | 0.003                | 0.036                 |
| NUCLEOTIDE_EXCISION_REPAIR                              | 44          | 0.58      | 1.78       | 0.001                | 0.004                | 0.054                 |
| TERPENOID BACKBONE<br>BIOSYNTHESIS                      | 15          | 0.72      | 1.74       | 0.003                | 0.008                | 0.094                 |
| UBIQUITIN MEDIATED PROTEOLYSIS                          | 133         | 0.47      | 1.71       | 0.000                | 0.011                | 0.138                 |
| BASAL TRASCRIPTION FACTORS                              | 35          | 0.58      | 1.70       | 0.001                | 0.012                | 0.163                 |
| OXIDATIVE PHOSPHORYLATION                               | 101         | 0.48      | 1.68       | 0.000                | 0.015                | 0.208                 |
| OOCYTE MEIOSIS                                          | 112         | 0.46      | 1.66       | 0.000                | 0.018                | 0.257                 |
| PYRIMIDINE METABOLISM                                   | 98          | 0.48      | 1.66       | 0.001                | 0.018                | 0.265                 |
| CITRATE CYCLE TCA CYCLE                                 | 30          | 0.58      | 1.64       | 0.008                | 0.021                | 0.327                 |
| PROTEIN EXPORT                                          | 23          | 0.58      | 1.60       | 0.009                | 0.031                | 0.477                 |
| MISMATCH REPAIR                                         | 23          | 0.59      | 1.59       | 0.008                | 0.031                | 0.501                 |
| PROGESTERONE MEDIATED<br>OOCYTE MATURATION              | 85          | 0.43      | 1.49       | 0.005                | 0.069                | 0.859                 |
| <b>Up regulated in Group 2 than Group 1</b>             |             |           |            |                      |                      |                       |
| HEMATOPOIETIC CELL LINEAGE                              | 85          | -0.52     | -1.99      | 0.000                | 0.005                | 0.005                 |
| ALLOGRAFT REJECTION                                     | 35          | -0.61     | -1.93      | 0.000                | 0.005                | 0.010                 |
| ARRHYTHMOGENIC RIGHT<br>VENTRICULAR CARDIOMYOPATHY ARVC | 74          | -0.51     | -1.89      | 0.003                | 0.007                | 0.020                 |
| CELL ADHESION MOLECULES CAMS                            | 131         | -0.46     | -1.85      | 0.000                | 0.010                | 0.037                 |

|                                            |     |       |       |       |       |       |
|--------------------------------------------|-----|-------|-------|-------|-------|-------|
| DILATED CARDIOMYOPATHY                     | 90  | -0.46 | -1.76 | 0.000 | 0.023 | 0.092 |
| NEUROACTIVE LIGAND RECEPTOR INTERACTION    | 271 | -0.40 | -1.72 | 0.000 | 0.030 | 0.149 |
| AUTOIMMUNE THYROID DISEASE                 | 50  | -0.50 | -1.68 | 0.000 | 0.034 | 0.191 |
| VASCULAR SMOOTH MUSCLE CONTRACTION         | 113 | -0.42 | -1.68 | 0.000 | 0.032 | 0.203 |
| GRAFT VERSUS HOST DISEASE                  | 37  | -0.51 | -1.67 | 0.002 | 0.030 | 0.216 |
| HYPERTROPHIC CARDIOMYOPATHY HCM            | 83  | -0.44 | -1.67 | 0.000 | 0.028 | 0.223 |
| ASTHMA                                     | 28  | -0.56 | -1.67 | 0.002 | 0.025 | 0.223 |
| LEISHMANIA INFECTION                       | 70  | -0.46 | -1.66 | 0.000 | 0.024 | 0.236 |
| TYPE 1 DIABETES MELLITUS                   | 41  | -0.50 | -1.66 | 0.000 | 0.024 | 0.249 |
| PRIMARY IMMUNODEFICIENCY                   | 35  | -0.51 | -1.64 | 0.008 | 0.026 | 0.279 |
| INTESTINAL IMMUNE NETWORK FOR IGA PRODUCTS | 45  | -0.49 | -1.63 | 0.005 | 0.026 | 0.298 |
| CALCIUM SIGNALING PATHWAY                  | 177 | -0.39 | -1.63 | 0.000 | 0.025 | 0.309 |
| CYTOKINE CYTOKINE RECEPTOR INTERACTION     | 262 | -0.36 | -1.58 | 0.000 | 0.036 | 0.426 |
| FOCAL ADHESION                             | 199 | -0.37 | -1.56 | 0.000 | 0.040 | 0.479 |
| ECM RECEPTOR INTERACTION                   | 84  | -0.40 | -1.51 | 0.003 | 0.053 | 0.620 |

#### **Up regulated in pre-treatment than post-treatment**

|                                                      |    |       |       |       |       |       |
|------------------------------------------------------|----|-------|-------|-------|-------|-------|
| RIBOSOME                                             | 86 | -0.58 | -1.70 | 0.000 | 0.069 | 0.080 |
| DNA_REPLICATION                                      | 36 | -0.65 | -1.65 | 0.002 | 0.080 | 0.170 |
| ARRHYTHMOGENIC RIGHT VENTRICULAR CARDIOMYOPATHY ARVC | 74 | -0.56 | -1.62 | 0.002 | 0.086 | 0.268 |

#### **Up regulated in post-treatment than pre-treatment**

|                                     |    |      |      |       |       |       |
|-------------------------------------|----|------|------|-------|-------|-------|
| ALLOGRAFT REJECTION                 | 35 | 0.74 | 2.10 | 0.000 | 0.000 | 0.000 |
| ASTHMA                              | 28 | 0.76 | 2.02 | 0.000 | 0.000 | 0.000 |
| GRAFT VERSUS HOST DISEASE           | 37 | 0.69 | 1.99 | 0.000 | 0.000 | 0.001 |
| COMPLEMENT AND COAGULATION CASCADES | 69 | 0.62 | 1.98 | 0.000 | 0.000 | 0.001 |
| AUTOIMMUNE THYROID DISEASE          | 50 | 0.65 | 1.97 | 0.000 | 0.000 | 0.001 |

|                                                          |    |      |      |       |       |       |
|----------------------------------------------------------|----|------|------|-------|-------|-------|
| RETINOL METABOLISM                                       | 64 | 0.61 | 1.88 | 0.000 | 0.002 | 0.012 |
| ANTIGEN PROCESSING AND<br>PRESENTATION                   | 81 | 0.56 | 1.82 | 0.000 | 0.005 | 0.029 |
| GLYCOSAMINOGLYCAN<br>BIOSYNTHESIS CHONDROITIN<br>SULFATE | 22 | 0.68 | 1.73 | 0.005 | 0.017 | 0.095 |
| INTESTINAL IMMUNE NETWORK FOR<br>IGA PRODUCTS            | 45 | 0.57 | 1.66 | 0.003 | 0.035 | 0.209 |
| TYPE 1 DIABETES MELLITUS                                 | 41 | 0.56 | 1.61 | 0.003 | 0.050 | 0.308 |
| LEISHMANIA INFECTION                                     | 70 | 0.50 | 1.56 | 0.000 | 0.065 | 0.441 |

---

Size, gene set size; ES, enrichment score; NES, normalized enrichment score; NOM p-val, normalized p-value; FDR q-val, false discovery rate q-value; FWER p-val, adjusted p-value of familywise-error rate.
