# Supplementary material for: Genetic and immune microenvironment characterization of HER2‐positive gastric cancer: Their association with response to trastuzumab‐based treatment
Source: PubMed Central journal article supplement (PMC10225221; doi:10.1002/cam4.5769), 2023-03-14
Supplement: CAM4-12-10371-s006.pdf [file CAM4-12-10371-s006.pdf]

## Supplementary Table 2.

(a)

| Sample ID (GRCh37) | Total number of sequenced reads | Total number of uniquely mapped non-duplicate reads | Total number of covered bases | Median coverage (and range) per base | Percentage of targeted bases with coverage $\geq 10$ (targeted panel: Illumina TruSight Oncology 500) |
|--------------------|---------------------------------|-----------------------------------------------------|-------------------------------|--------------------------------------|-------------------------------------------------------------------------------------------------------|
| S09-0024194        | 69,872,856                      | 45,681,504                                          | 3,830,473,059                 | 270 (1-9910)                         | 99.7                                                                                                  |
| S15-0005814        | 76,888,782                      | 50,030,328                                          | 4,229,313,877                 | 380 (1-8517)                         | 99.8                                                                                                  |
| S09-0039859        | 75,498,616                      | 50,558,914                                          | 4,095,325,285                 | 235 (1-1760)                         | 99.7                                                                                                  |
| S10-0029913        | 71,185,790                      | 48,074,766                                          | 3,932,852,537                 | 239 (1-1718)                         | 99.7                                                                                                  |
| S11-0004115        | 74,410,956                      | 47,932,912                                          | 4,018,795,125                 | 257 (1-3395)                         | 99.8                                                                                                  |
| S11-0009459        | 78,290,960                      | 51,535,820                                          | 4,261,910,510                 | 257 (1-9261)                         | 99.8                                                                                                  |
| S12-0025262        | 75,396,260                      | 48,377,430                                          | 3,896,267,861                 | 176 (1-2115)                         | 99.7                                                                                                  |
| S11-0010997        | 68,613,238                      | 44,935,497                                          | 3,779,244,629                 | 279 (1-3033)                         | 99.7                                                                                                  |
| S11-0037698        | 81,918,226                      | 55,875,365                                          | 4,885,822,203                 | 311 (1-2488)                         | 99.8                                                                                                  |
| S12-0002568        | 72,672,898                      | 49,262,897                                          | 4,177,475,027                 | 279 (1-1870)                         | 99.8                                                                                                  |
| S12-0046135        | 93,719,254                      | 63,287,901                                          | 5,458,793,293                 | 265 (1-17381)                        | 99.8                                                                                                  |
| S14-0014942        | 76,525,058                      | 46,654,601                                          | 4,091,485,247                 | 309 (1-8477)                         | 99.7                                                                                                  |
| S14-0040813        | 80,178,502                      | 49,682,333                                          | 4,361,261,805                 | 326 (1-2020)                         | 99.8                                                                                                  |
| S15-0029256        | 81,086,826                      | 53,780,778                                          | 4,709,945,271                 | 312 (1-3250)                         | 99.7                                                                                                  |
| S16-0002113        | 79,187,114                      | 52,876,168                                          | 4,589,513,342                 | 207 (1-6033)                         | 99.7                                                                                                  |
| S16-0005228        | 81,030,524                      | 54,845,495                                          | 4,822,743,338                 | 421 (1-2105)                         | 99.7                                                                                                  |
| S16-0022463        | 73,161,788                      | 47,530,252                                          | 4,138,309,818                 | 451 (1-2583)                         | 99.8                                                                                                  |
| S16-0037789        | 80,650,228                      | 54,568,309                                          | 4,779,850,798                 | 335 (1-4188)                         | 99.7                                                                                                  |
| S16-0044174        | 80,028,340                      | 51,636,783                                          | 4,515,929,834                 | 460 (1-3755)                         | 99.8                                                                                                  |
| S17-0005322        | 76,876,548                      | 52,134,839                                          | 4,551,963,806                 | 321 (1-10625)                        | 99.8                                                                                                  |
| S17-0022768        | 67,522,402                      | 38,319,791                                          | 4,257,546,796                 | 415 (1-2831)                         | 99.7                                                                                                  |
| S17-0037969        | 141,212,674                     | 87,953,657                                          | 9,433,612,336                 | 278 (1-2100)                         | 99.7                                                                                                  |

(b)

| Sample ID    | Total number of sequenced reads | Total number of uniquely mapped reads | RNA integrity number (RIN) | Ratio of all reads aligned to rRNA regions to total uniquely mapped reads (rRNA rate) | Ratio of exon-mapped reads to total uniquely mapped reads (Expression Profile Efficiency) | Total number of detected transcripts with reads $\geq 1$ |
|--------------|---------------------------------|---------------------------------------|----------------------------|---------------------------------------------------------------------------------------|-------------------------------------------------------------------------------------------|----------------------------------------------------------|
| S09-0039859  | 50,144,824                      | 37,387,202                            | 2.3                        | 0.009                                                                                 | 0.694                                                                                     | 26,108                                                   |
| S10-0029913  | 45,081,107                      | 34,621,201                            | 2.5                        | 0.010                                                                                 | 0.838                                                                                     | 26,314                                                   |
| S11-0009459  | 39,335,214                      | 31,011,533                            | 2.4                        | 0.009                                                                                 | 0.838                                                                                     | 25,630                                                   |
| S11-0010997  | 52,176,373                      | 41,226,744                            | 2.4                        | 0.010                                                                                 | 0.857                                                                                     | 28,952                                                   |
| S11-0037698  | 12,684,497                      | 9,613,446                             | 2.5                        | 0.021                                                                                 | 0.814                                                                                     | 22,967                                                   |
| S12-0002568  | 51,004,620                      | 42,736,108                            | 2.4                        | 0.013                                                                                 | 0.851                                                                                     | 28,615                                                   |
| S12-0011227  | 35,759,592                      | 29,580,661                            | 6.6                        | 0.012                                                                                 | 0.855                                                                                     | 26,079                                                   |
| S12-0046135  | 63,872,018                      | 53,203,090                            | 2.3                        | 0.013                                                                                 | 0.878                                                                                     | 32,662                                                   |
| S14-0014942  | 64,877,989                      | 51,971,987                            | 2.3                        | 0.016                                                                                 | 0.824                                                                                     | 31,036                                                   |
| S14-0040813  | 58,294,856                      | 47,906,467                            | 1.5                        | 0.012                                                                                 | 0.854                                                                                     | 33,584                                                   |
| S14-0046360  | 65,623,065                      | 55,261,289                            | 2.4                        | 0.011                                                                                 | 0.868                                                                                     | 29,588                                                   |
| S15-0005814  | 51,614,677                      | 39,485,327                            | 2.7                        | 0.018                                                                                 | 0.747                                                                                     | 27,271                                                   |
| S15-0011946  | 58,207,049                      | 48,981,503                            | 2.2                        | 0.007                                                                                 | 0.846                                                                                     | 29,194                                                   |
| S15-0015504  | 22,526,451                      | 12,683,070                            | 2.3                        | 0.003                                                                                 | 0.532                                                                                     | 25,185                                                   |
| S15-0024523  | 52,158,921                      | 41,640,821                            | 2.5                        | 0.009                                                                                 | 0.820                                                                                     | 29,834                                                   |
| S15-0050616  | 42,991,580                      | 35,354,771                            | 2.2                        | 0.006                                                                                 | 0.878                                                                                     | 25,116                                                   |
| S16-0002113  | 35,747,974                      | 29,132,743                            | 2.2                        | 0.015                                                                                 | 0.862                                                                                     | 28,492                                                   |
| S16-0002170  | 57,077,741                      | 39,287,199                            | 2.4                        | 0.015                                                                                 | 0.856                                                                                     | 29,600                                                   |
| S16-0005228  | 75,068,522                      | 60,145,753                            | 2.5                        | 0.013                                                                                 | 0.850                                                                                     | 33,050                                                   |
| S16-0010218  | 80,410,808                      | 65,615,778                            | 2.5                        | 0.009                                                                                 | 0.856                                                                                     | 30,382                                                   |
| S16-0010293  | 19,626,677                      | 13,257,176                            | 2.3                        | 0.004                                                                                 | 0.878                                                                                     | 20,425                                                   |
| S16-0014112  | 61,145,044                      | 50,408,603                            | 2.5                        | 0.010                                                                                 | 0.851                                                                                     | 29,876                                                   |
| S16-0015253  | 28,107,933                      | 12,349,643                            | 2.6                        | 0.000                                                                                 | 0.234                                                                                     | 14,045                                                   |
| S16-0016629  | 18,747,472                      | 14,557,503                            | 2.5                        | 0.001                                                                                 | 0.844                                                                                     | 19,868                                                   |
| S16-0022463  | 74,172,534                      | 58,162,254                            | 2.4                        | 0.010                                                                                 | 0.886                                                                                     | 30,761                                                   |
| S16-0023700  | 76,925,302                      | 59,655,545                            | 2.5                        | 0.015                                                                                 | 0.774                                                                                     | 32,934                                                   |
| S16-0027112  | 61,571,238                      | 49,315,682                            | 2.5                        | 0.015                                                                                 | 0.808                                                                                     | 29,713                                                   |
| S16-0027501  | 51,737,833                      | 43,575,324                            | 2.5                        | 0.015                                                                                 | 0.849                                                                                     | 28,766                                                   |
| S16-0032848  | 35,435,466                      | 27,581,468                            | 2.6                        | 0.001                                                                                 | 0.823                                                                                     | 20,873                                                   |
| S16-0036144  | 75,608,724                      | 57,751,695                            | 2.5                        | 0.009                                                                                 | 0.797                                                                                     | 28,614                                                   |
| S16-0037789  | 61,201,272                      | 47,250,169                            | 2.3                        | 0.019                                                                                 | 0.802                                                                                     | 34,344                                                   |
| S16-0039501  | 53,056,667                      | 40,927,560                            | 2.5                        | 0.011                                                                                 | 0.815                                                                                     | 30,745                                                   |
| S16-0040169  | 99,366,726                      | 78,981,395                            | 2.5                        | 0.006                                                                                 | 0.835                                                                                     | 29,888                                                   |
| S16-0042813  | 40,913,280                      | 27,917,630                            | 2.5                        | 0.006                                                                                 | 0.789                                                                                     | 23,404                                                   |
| S16-0044174  | 70,302,844                      | 57,049,047                            | 2.4                        | 0.009                                                                                 | 0.850                                                                                     | 31,072                                                   |
| S16-0044542  | 55,753,637                      | 46,576,840                            | 2.5                        | 0.008                                                                                 | 0.853                                                                                     | 31,253                                                   |
| S16-0046295  | 36,479,179                      | 28,474,054                            | 2.5                        | 0.022                                                                                 | 0.771                                                                                     | 27,377                                                   |
| S16-0047073  | 60,317,943                      | 49,692,609                            | 2.6                        | 0.013                                                                                 | 0.822                                                                                     | 30,582                                                   |
| S16-0047450  | 82,214,420                      | 65,451,883                            | 2.6                        | 0.015                                                                                 | 0.839                                                                                     | 33,189                                                   |
| S16-0051220  | 67,254,892                      | 51,108,858                            | 2.6                        | 0.007                                                                                 | 0.813                                                                                     | 29,708                                                   |
| S16-0052834  | 25,099,020                      | 18,724,449                            | 2.6                        | 0.005                                                                                 | 0.608                                                                                     | 28,728                                                   |
| S17-0004535  | 71,472,849                      | 56,741,165                            | 2.5                        | 0.006                                                                                 | 0.864                                                                                     | 32,230                                                   |
| S17-0005322  | 68,595,873                      | 57,101,992                            | 2.3                        | 0.012                                                                                 | 0.866                                                                                     | 30,464                                                   |
| S17-0010308  | 44,706,829                      | 34,836,092                            | 2.5                        | 0.010                                                                                 | 0.799                                                                                     | 28,664                                                   |
| S17-0013690N | 69,598,811                      | 52,797,332                            | 2.6                        | 0.010                                                                                 | 0.789                                                                                     | 27,323                                                   |
| S17-0013690  | 46,566,978                      | 34,564,528                            | 2.5                        | 0.010                                                                                 | 0.786                                                                                     | 28,496                                                   |
| S17-0016300  | 53,740,656                      | 43,042,725                            | 2.6                        | 0.006                                                                                 | 0.868                                                                                     | 26,702                                                   |
| S17-0022768  | 68,571,207                      | 56,166,499                            | 2.4                        | 0.010                                                                                 | 0.876                                                                                     | 33,009                                                   |
| S17-0022784  | 28,451,910                      | 21,417,156                            | 5.6                        | 0.008                                                                                 | 0.789                                                                                     | 23,793                                                   |
| S17-0037969  | 58,834,637                      | 32,709,943                            | 2.3                        | 0.024                                                                                 | 0.766                                                                                     | 31,066                                                   |
| S17-0039675  | 29,436,652                      | 14,981,778                            | 1.1                        | 0.000                                                                                 | 0.258                                                                                     | 18,055                                                   |
| S17-0047553  | 71,423,825                      | 60,892,639                            | 4.6                        | 0.013                                                                                 | 0.875                                                                                     | 31,622                                                   |
| S17-0048117  | 39,415,298                      | 29,954,921                            | 2.5                        | 0.009                                                                                 | 0.774                                                                                     | 29,637                                                   |
| S17-0052786  | 58,458,513                      | 44,300,505                            | 2.6                        | 0.014                                                                                 | 0.860                                                                                     | 32,356                                                   |
| S17-0053053N | 60,899,578                      | 48,085,357                            | 2.5                        | 0.011                                                                                 | 0.820                                                                                     | 31,992                                                   |
| S17-0055533  | 23,237,916                      | 18,125,121                            | 1.9                        | 0.005                                                                                 | 0.808                                                                                     | 24,070                                                   |
| S17-0056487  | 53,298,503                      | 40,385,304                            | 2.1                        | 0.009                                                                                 | 0.815                                                                                     | 28,621                                                   |
| S18-0004302N | 50,630,205                      | 38,941,444                            | 2.6                        | 0.008                                                                                 | 0.824                                                                                     | 27,500                                                   |
| S18-0004302  | 53,761,036                      | 43,403,164                            | 2.6                        | 0.008                                                                                 | 0.856                                                                                     | 32,415                                                   |
| S18-0013605  | 47,608,294                      | 36,559,829                            | 2.6                        | 0.012                                                                                 | 0.808                                                                                     | 26,110                                                   |
| S18-0020718  | 46,938,944                      | 38,963,900                            | 2.3                        | 0.018                                                                                 | 0.841                                                                                     | 31,141                                                   |
| S18-0023524  | 38,069,189                      | 29,321,879                            | 2.5                        | 0.011                                                                                 | 0.814                                                                                     | 25,362                                                   |
| S18-0024830  | 39,715,745                      | 30,283,445                            | 2.5                        | 0.016                                                                                 | 0.776                                                                                     | 31,057                                                   |
| S11-0004115  | 68,447,794                      | 55,290,443                            | 2.3                        | 0.007                                                                                 | 0.821                                                                                     | 24,929                                                   |
| S15-0029256  | 29,390,484                      | 20,067,836                            | -                          | 0.001                                                                                 | 0.464                                                                                     | 21,804                                                   |
| S16-0050778  | 38,639,109                      | 26,442,724                            | -                          | 0.001                                                                                 | 0.401                                                                                     | 21,537                                                   |
| S09-0024194  | 57,019,857                      | 46,060,291                            | -                          | 0.009                                                                                 | 0.822                                                                                     | 25,707                                                   |
| S12-0025262  | 25,531,055                      | 17,699,945                            | 2.2                        | 0.005                                                                                 | 0.658                                                                                     | 20,028                                                   |
| S17-0053053  | 52,758,494                      | 28,712,363                            | 2.4                        | 0.004                                                                                 | 0.609                                                                                     | 25,935                                                   |
